# Supplementary material
Source: JCI journal article supplement (doi:10.1172/jci179362)
Supplement: sd1 [file 1]

A

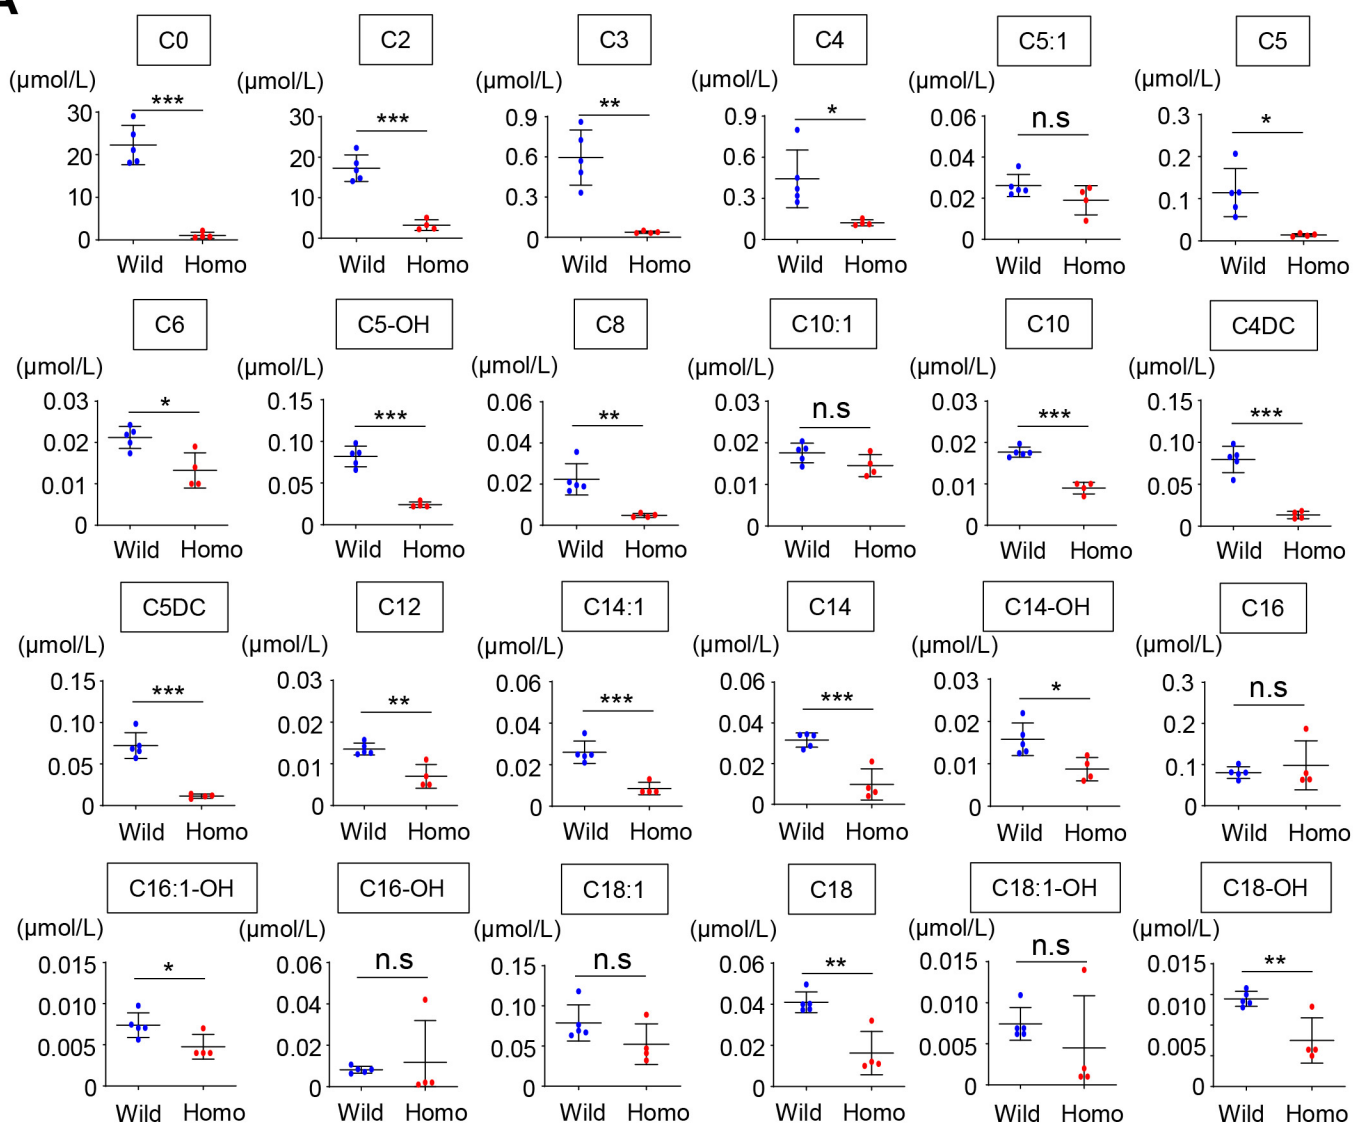

### Supplementary Figure 1. Detailed carnitine profiling in JVS mice

(A) LC-MS/MS provided carnitine profiles with plasma in JVS mice (n=4) and wild-type mice (n=5). Data are presented as means  $\pm$  SD. \*P < 0.05, \*\*P < 0.01, \*\*\*P < 0.001. JVS, juvenile visceral steatosis; LC-MS/MS, liquid chromatograph-mass spectrometry.

## Supplementary Figure 2

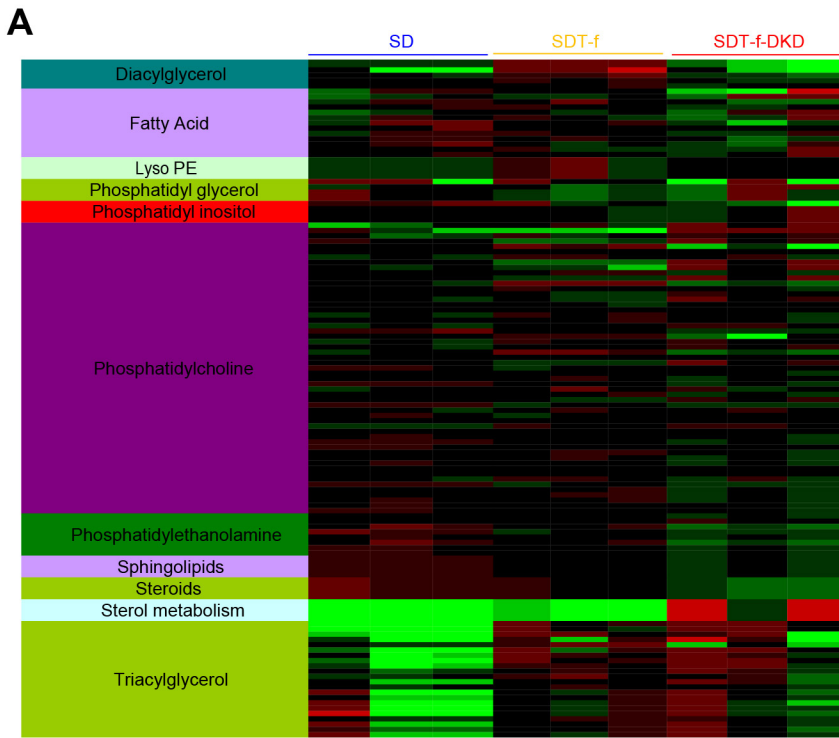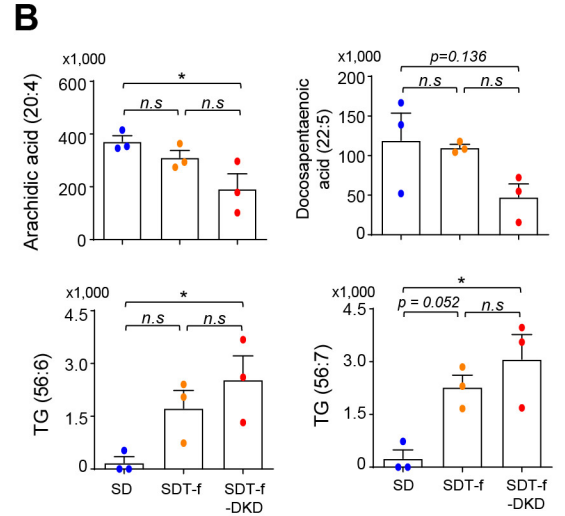

### Supplementary Figure 2. Ectopic lipid accumulates in the kidney of DKD rats.

(A) Heat map analysis of lipid metabolites based on fold change in SD (n=3), SDT-f (n=3), and SDT-f-DKD (n=3). (B) Corresponding data of arachidic acid (20:4), docosapentaenoic acid (22:5), TG (56:6), and TG (56:7). Data are presented as means  $\pm$  SD. \* $P < 0.05$ . DKD, diabetic kidney disease; SD, Sprague-Dawley; SDT, spontaneously diabetic torii, SDT-f, spontaneously diabetic torii-fatty; TG, triglycerides.

## A Plasma

# Supplementary Figure 3

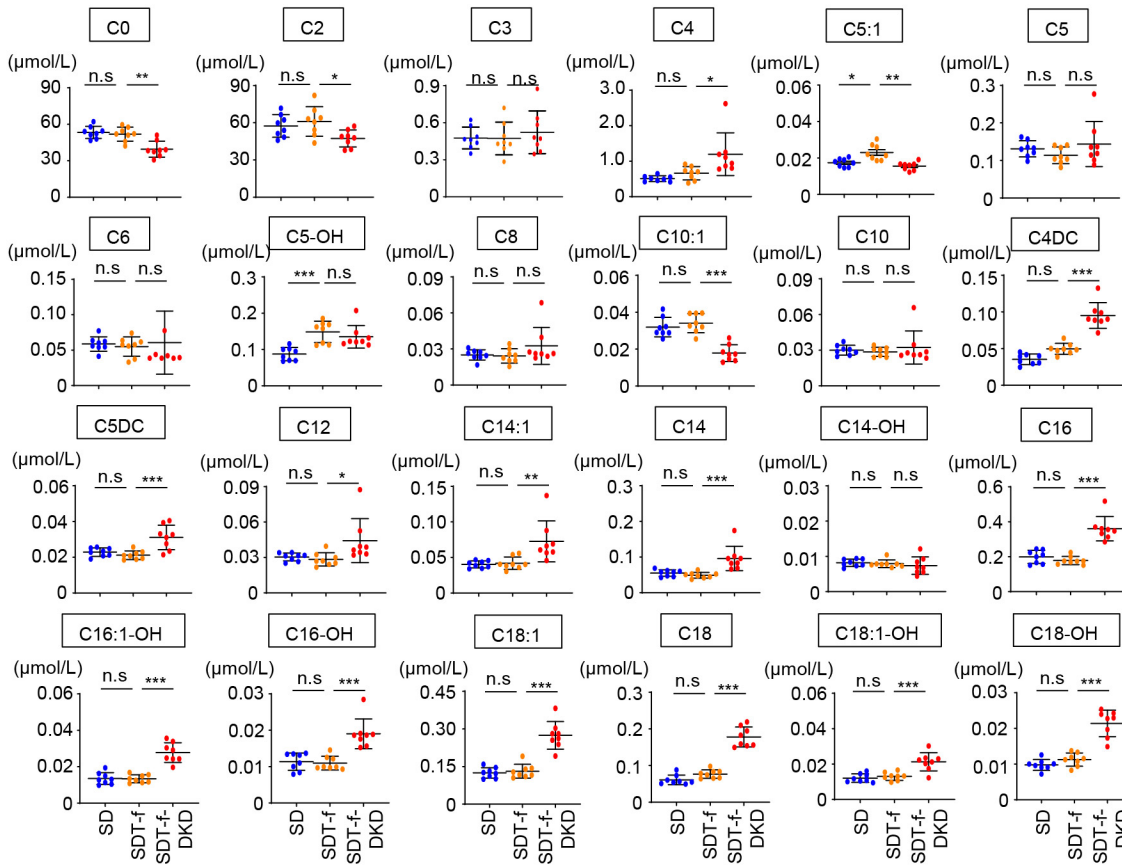

## B Urine

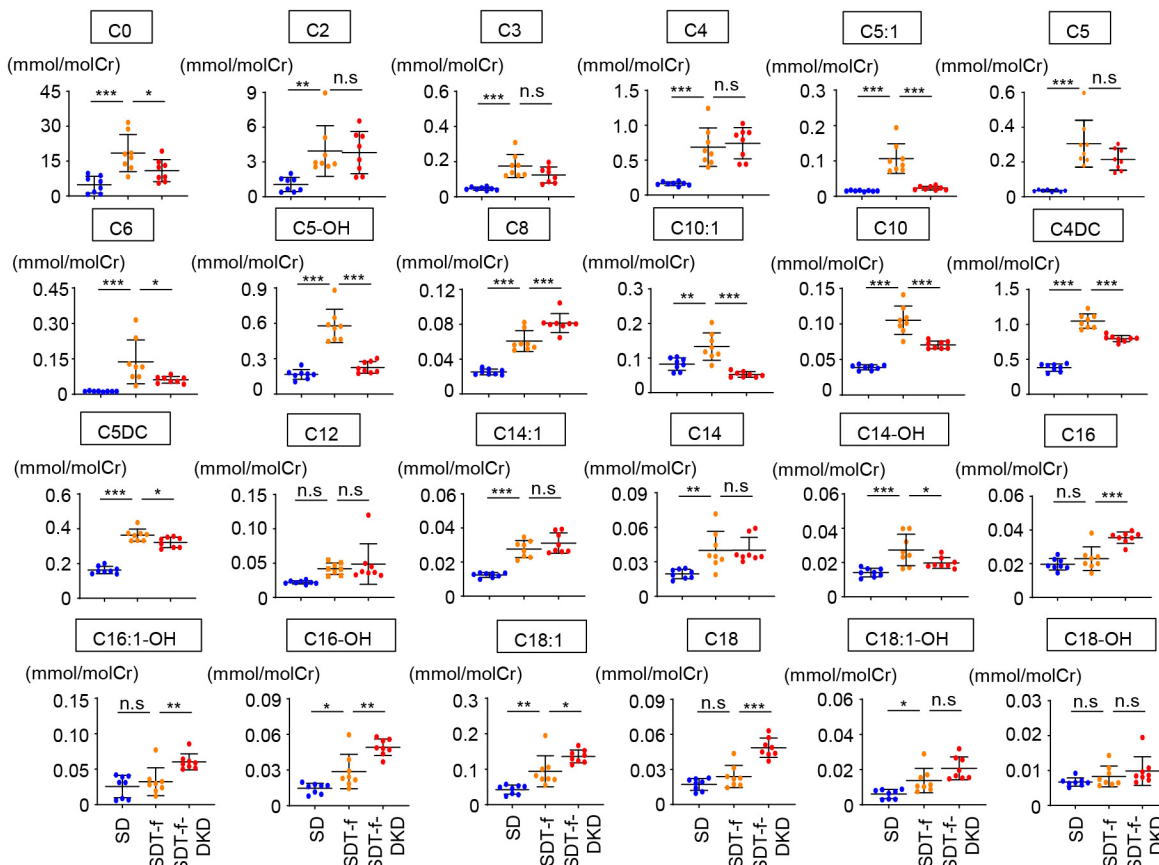

### Supplementary Figure 3. Detailed carnitine profiling in SD, SDT-f, and SDT-f-DKD rats.

(A) LC-MS/MS provided the carnitine profiles of the plasma of SD (n=8), SDT-f (n=8), and SDT-f-DKD rats (n=8). (B) Urine carnitine profiles of the urine of SD (n=8), SDT-f (n=8), and SDT-f-DKD rats (n=8). Data are presented as means  $\pm$  SD. \*P < 0.05, \*\*P < 0.01, \*\*\*P < 0.001. SD, Sprague-Dawley; SDT, spontaneously diabetic torii, SDT-f, spontaneously diabetic torii-fatty; DKD, diabetic kidney disease; LC-MS/MS, liquid chromatograph-mass spectrometry.

**A Plasma**

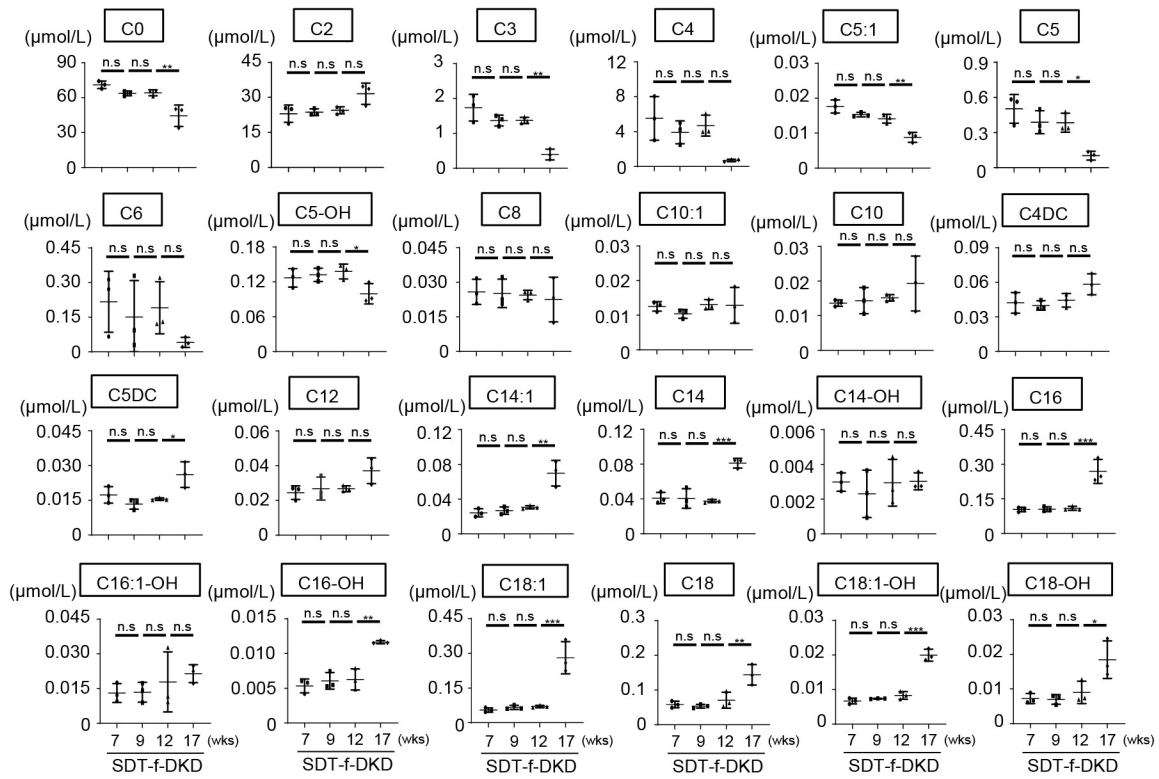

**B Urine**

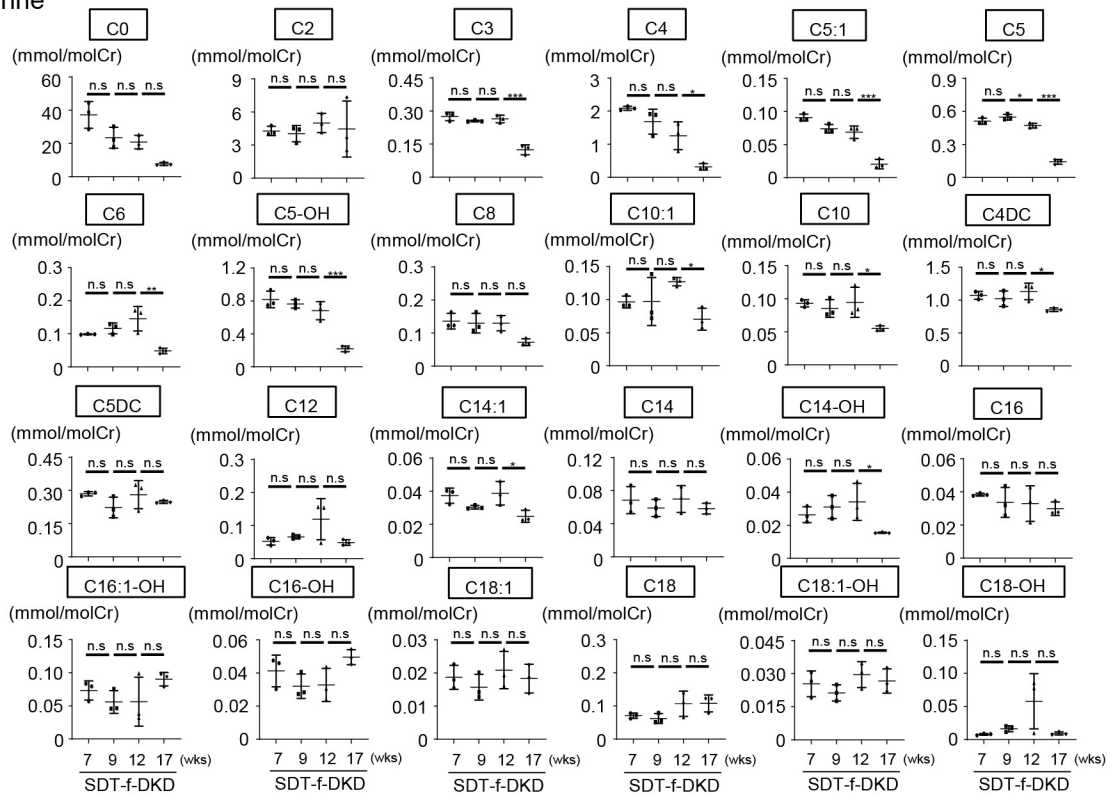

**Supplementary Figure 4. Detailed carnitine profiling in over the time-course of SDT-f-DKD rats**

(A) LC-MS/MS provided the carnitine profiles of the plasma and (B) urine in SDT-f-DKD rats at 7, 9, 12 and 17 weeks of age. n=3, respectively. Data are presented as means ± SD. \*P < 0.05, \*\*P < 0.01, \*\*\*P < 0.001. SDT-f, spontaneously diabetic torii-fatty; DKD, diabetic kidney disease; L-Car, L-carnitine; LC-MS/MS, liquid chromatograph-mass spectrometry.

**A Plasma**

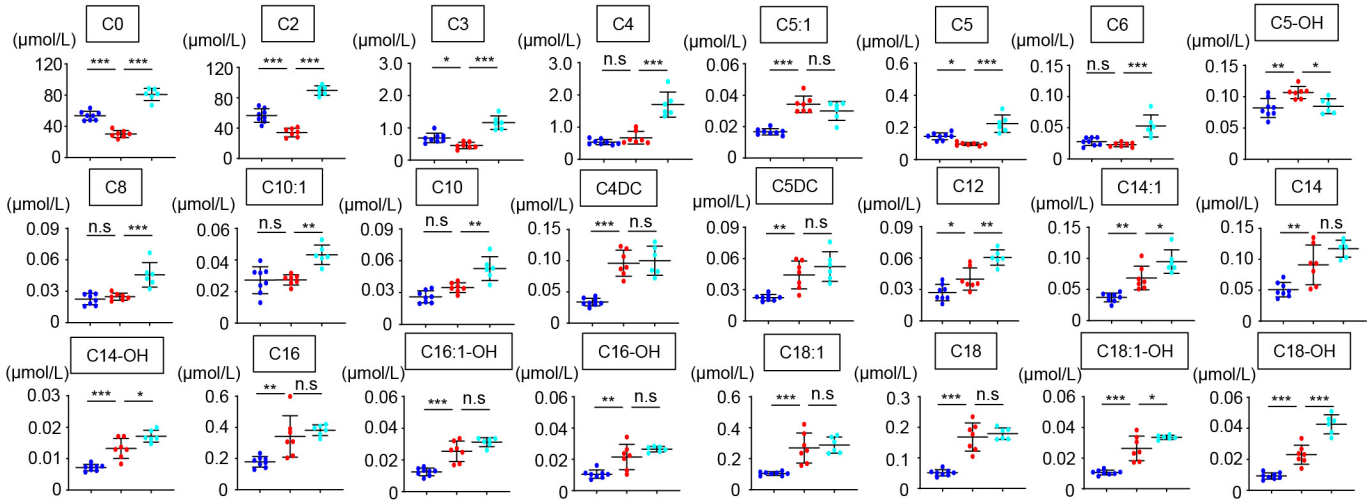

**B Urine**

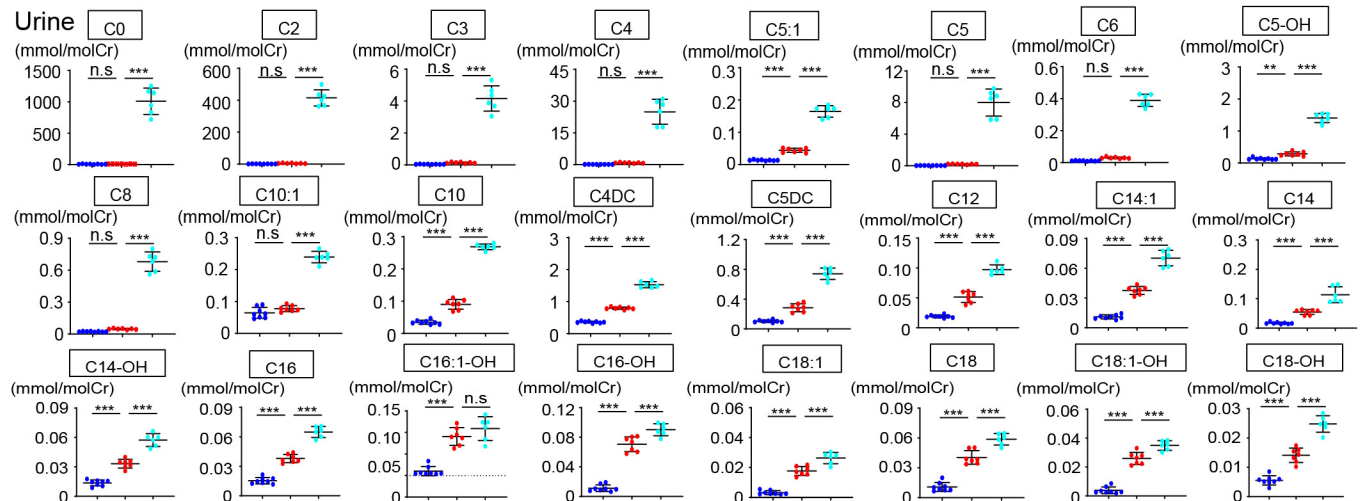

**C Kidney**

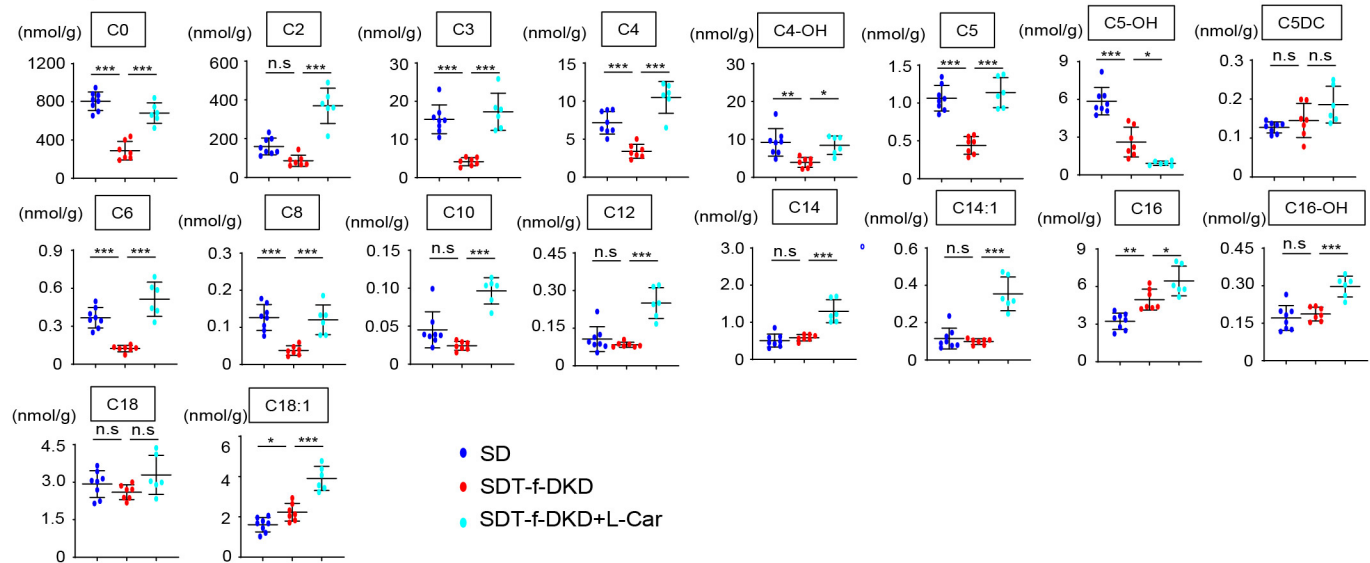

**Supplementary Figure 5. Detailed carnitine profiling of SDT-f-DKD rats treated with L-carnitine supplementation.**

(A) LC-MS/MS provided the carnitine profiles of the plasma of SD (n=8), SDT-f-DKD (n=7), and SDT-f-DKD+L-Car rats (n=6). (B) Urine carnitine profiles of the urine of SD (n=8), SDT-f-DKD (n=7), and SDT-f-DKD rats+L-Car rats (n=6). (C) Carnitine profiling of the kidney cortex of SD (n=8), SDT-f-DKD (n=7), and SDT-f-DKD+L-Car rats (n=6). Data are presented as means ± SD. \*P < 0.05, \*\*P < 0.01, \*\*\*P < 0.001. SDT, spontaneously diabetic torii, SDT-f, spontaneously diabetic torii-fatty; DKD, diabetic kidney disease; SD, Sprague-Dawley; LC-MS/MS, liquid chromatograph-mass spectrometry; L-Car, L-carnitine.

## A Plasma

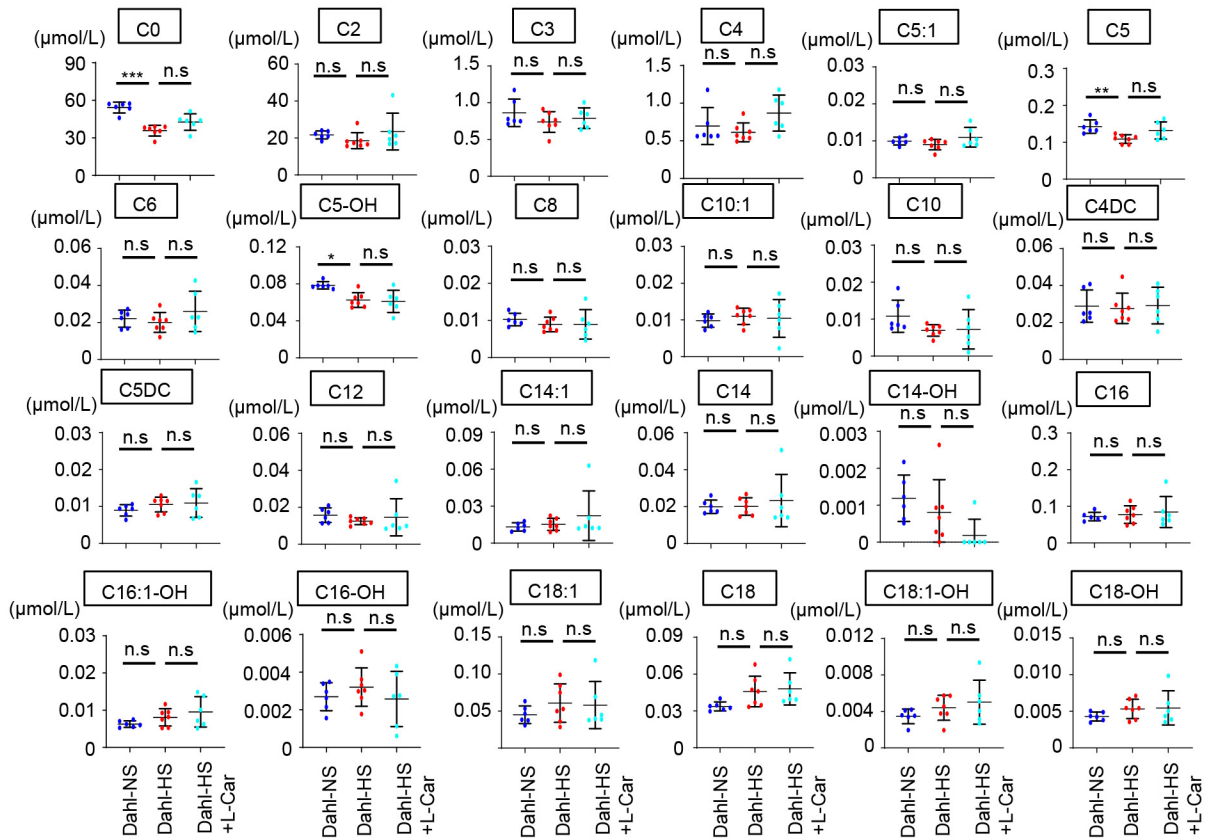

## B Urine

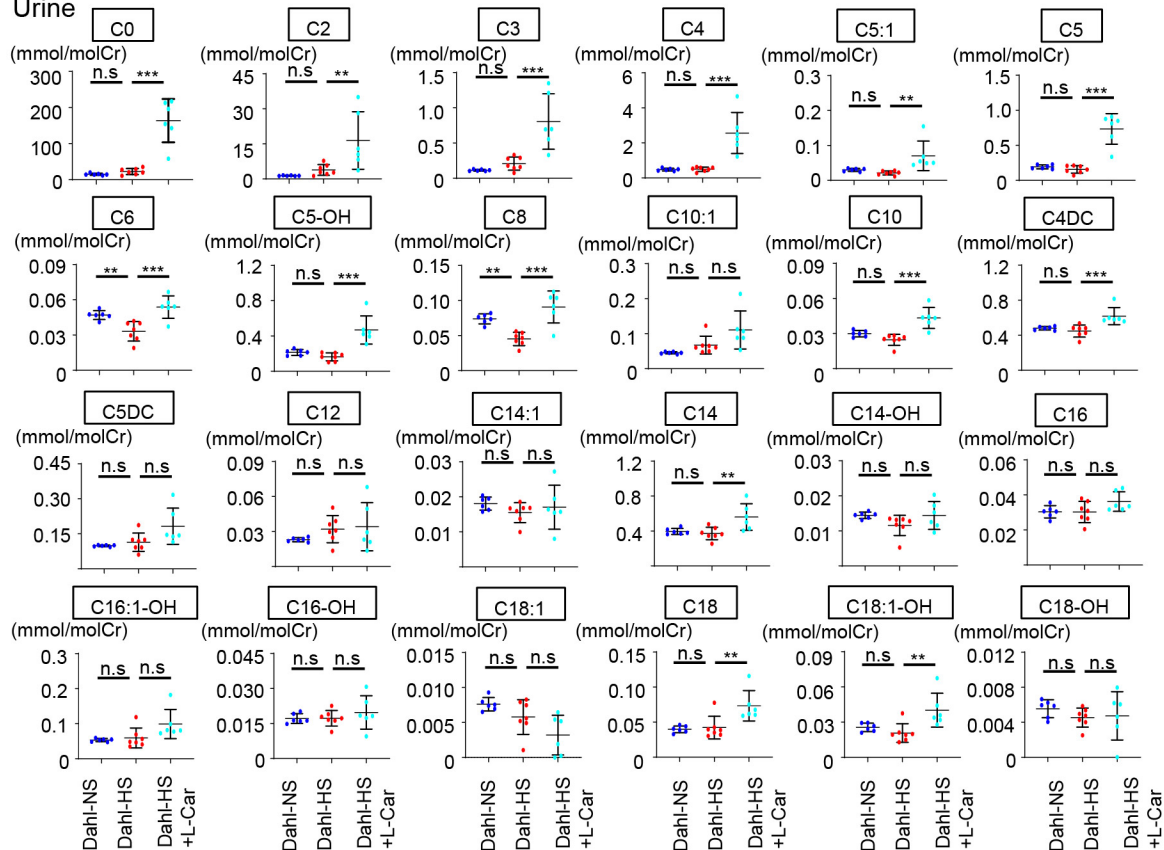

## Supplementary Figure 6. Detailed carnitine profiling in Dahl rat treated with or without L-Car.

(A) LC-MS/MS provided the carnitine profiles of the plasma of Dahl-NS (n=6), Dahl-HS (n=7), and Dahl-HS+L-car (n=6). (B) Urine carnitine profiles of the urine of Dahl-NS (n=6), Dahl-HS (n=7), and Dahl-HS+L-car (n=6). Data are presented as means  $\pm$  SD. \*P < 0.05, \*\*P < 0.01, \*\*\*P < 0.001. NS, normal salt; HS, high salt; Car, carnitine; LC-MS/MS, liquid chromatography-mass spectrometry.

Supplementary Table 1. Characteristics of SDT-fatty rats and SDT-fatty DKD rats

|                           | SD            | SDT-f                          | SDT-f-DKD                               |
|---------------------------|---------------|--------------------------------|-----------------------------------------|
| Number                    | 8             | 8                              | 8                                       |
| Body weight (g)           | 516.3 ± 43.8  | 539.4 ± 38.5                   | 632.4 ± 57.2 <sup>##</sup>              |
| Glycated albumin (%)      | 7.9 ± 0.5     | 24.2 ± 3.9 <sup>***</sup>      | 6.9 ± 3.6 <sup>###</sup>                |
| BUN (mg/dL)               | 14.4 ± 1.8    | 26.1 ± 8.8 <sup>**</sup>       | 35.8 ± 5.7 <sup>#</sup>                 |
| Creatinine (mg/dL)        | 0.29 ± 0.04   | 0.22 ± 0.05                    | 0.54 ± 0.08 <sup>###</sup>              |
| Total cholesterol (mg/dL) | 51.0 ± 6.1    | 131.4 ± 11.5 <sup>***</sup>    | 278.9 ± 62.2 <sup>###</sup>             |
| Triglycerides (mg/dL)     | 47.8 ± 18.6   | 297.6 ± 37.1 <sup>*</sup>      | 771.4 ± 284.8 <sup>###</sup>            |
| HDL-cholesterol (mg/dL)   | 23.3 ± 2.0    | 56.3 ± 3.3 <sup>***</sup>      | 55.5 ± 6.6                              |
| LDL-cholesterol (mg/dL)   | 7.4 ± 1.8     | 9.1 ± 3.0                      | 28.0 ± 20.5 <sup>#</sup>                |
| Insulin (pg/mL)           | 219.5 ± 209.0 | 2075.7 ± 1091.7 <sup>***</sup> | 2093.0 ± 484.2                          |
| Glucagon (pmol/L)         | 3.5 ± 2.5     | 2.4 ± 1.4                      | 10.5 ± 5.6 <sup>**</sup> <sup>###</sup> |
| Urinary albumin (mg/gCr)  | 0.01 ± 0.00   | 3.52 ± 0.49 <sup>***</sup>     | 5.67 ± 2.34 <sup>#</sup>                |

Data are shown as mean ± SD.

Abbreviations: SD=Sprague-Dawley, SDT-f=Spontaneously Diabetic Torii-fatty, DKD=Diabetic Kidney Disease, HDL=high-density lipoprotein, LDL=low-density lipoprotein.

\* p < 0.05, \*\* p < 0.01, \*\*\* p < 0.001 vs SD, # p < 0.05, ### p < 0.01, #### p < 0.001 vs SDT-f

Supplementary Table 2. Clinical characteristics over time-course of SDT-f-DKD rats

| SDT-f-DKD rats            | 7W           | 9W            | 12W               | 17W                   |
|---------------------------|--------------|---------------|-------------------|-----------------------|
| Number                    | 3            | 3             | 3                 | 3                     |
| Body weight (g)           | 320.5 ± 4.1  | 443.6 ± 5.6** | 582.4 ± 35.5***## | 736.8 ± 43.3***####†† |
| BUN (mg/dL)               | 38.3 ± 5.0   | 30.0 ± 1.0    | 30.7 ± 4.2        | 29.7 ± 8.7            |
| Creatinine (mg/dL)        | 0.29 ± 0.02  | 0.29 ± 0.02   | 0.30 ± 0.03       | 0.44 ± 0.05***####††  |
| Total cholesterol (mg/dL) | 119.7 ± 4.9  | 109.0 ± 13.0  | 161.3 ± 18.6      | 265.3 ± 99.8*#        |
| Triglycerides (mg/dL)     | 295.3 ± 29.7 | 325.3 ± 28.2  | 437.7 ± 92.3      | 661.7 ± 446.1         |
| HDL-cholesterol (mg/dL)   | 85.3 ± 6.7   | 84.7 ± 9.8    | 114.7 ± 9.5*#     | 131.0 ± 9.5***##      |
| LDL-cholesterol (mg/dL)   | 16.7 ± 0.6   | 9.7 ± 2.1     | 19.3 ± 4.0        | 48.7 ± 32.2           |
| Urinary albumin (mg/gCr)  | 0.65 ± 0.32  | 2.11 ± 1.60   | 5.34 ± 2.35*      | 7.19 ± 0.46***##      |

Data are shown as mean ± SD.

Abbreviations: SDT-f=Spontaneously Diabetic Torii-fatty, DKD=Diabetic Kidney Disease, HDL=high-density lipoprotein, LDL=low-density lipoprotein.

\* p < 0.05, \*\* p < 0.01, \*\*\* p < 0.001 vs 7W, # p < 0.05, ## p < 0.01, ### p < 0.001 vs 9W, ††: P < 0.01 vs 12W

Supplementary Table 3. Characteristics of SDT-fatty DKD rats with or without L-Carnitine treatment

|                           | SD           | SDT-f-DKD         | SDT-f-DKD + L-Carnitine |
|---------------------------|--------------|-------------------|-------------------------|
| Number                    | 8            | 7                 | 6                       |
| Body weight (g)           | 547.3 ± 29.9 | 676.6 ± 51.3***   | 628.5 ± 67.1            |
| Glycated albumin (%)      | 7.7 ± 0.9    | 6.7 ± 2.9         | 8.5 ± 2.1               |
| BUN (mg/dL)               | 15.4 ± 2.6   | 38.7 ± 9.5***     | 30.0 ± 5.8              |
| Creatinine (mg/dL)        | 0.30 ± 0.05  | 0.67 ± 0.20***    | 0.47 ± 0.11#            |
| Total cholesterol (mg/dL) | 47.8 ± 8.8   | 337.4 ± 74.4***   | 295.2 ± 83.5            |
| Triglycerides (mg/dL)     | 49.4 ± 20.7  | 643.6 ± 199.8***  | 564.3 ± 161.3           |
| HDL-cholesterol (mg/dL)   | 23.3 ± 3.1   | 68.6 ± 5.5***     | 66.3 ± 10.6             |
| LDL-cholesterol (mg/dL)   | 4.6 ± 1.2    | 33.7 ± 18.8**     | 24.7 ± 18.5             |
| Insulin (pg/mL)           | 123.7 ± 96.7 | 2041.1 ± 692.7*** | 1846.4 ± 841.3          |
| Glucagon (pmol/L)         | 3.6 ± 1.0    | 17.5 ± 5.4***     | 11.4 ± 3.6#             |
| Urinary albumin (mg/gCr)  | 0.01 ± 0.00  | 8.99 ± 2.04***    | 6.15 ± 1.51#            |

Data are shown as mean ± SD.

Abbreviations: SD=Sprague-Dawley, SDT-f=Spontaneously Diabetic Torii-fatty, DKD=Diabetic Kidney Disease, HDL=high-density lipoprotein, LDL=low-density lipoprotein.

\* p < 0.05, \*\* p < 0.01, \*\*\* p < 0.001 vs SD, # p < 0.05 vs SDT-f-DKD

Supplementary Table 4. Characteristics of Dahl-S rats with or without L-Carnitine treatment

|                           | Dahl-NS      | Dahl-HS                      | Dahl-HS + L-Carnitine       |
|---------------------------|--------------|------------------------------|-----------------------------|
| Number                    | 6            | 7                            | 6                           |
| Body weight (g)           | 323.6 ± 11.4 | 283.9 ± 34.4                 | 285.1 ± 44.2                |
| BUN (mg/dL)               | 17.2 ± 1.7   | 27.1 ± 8.7                   | 27.5 ± 10.2                 |
| Creatinine (mg/dL)        | 0.26 ± 0.02  | 0.35 ± 0.10                  | 0.30 ± 0.06                 |
| Total cholesterol (mg/dL) | 58.1 ± 1.8   | 104.3 ± 11.1 <sup>***</sup>  | 99.2 ± 15.8 <sup>***</sup>  |
| Triglycerides (mg/dL)     | 173.5 ± 11.6 | 213.9 ± 118.5 <sup>***</sup> | 218.8 ± 108.2               |
| HDL-cholesterol (mg/dL)   | 24.2 ± 0.7   | 36.6 ± 9.6 <sup>*</sup>      | 48.7 ± 6.7 <sup>*** #</sup> |
| LDL-cholesterol (mg/dL)   | 11.2 ± 1.2   | 22.3 ± 5.3 <sup>**</sup>     | 27.3 ± 8.2 <sup>***</sup>   |
| Urinary albumin (mg/gCr)  | 0.77 ± 0.56  | 3.54 ± 1.62                  | 6.86 ± 4.77 <sup>**</sup>   |

Data are shown as mean ± SD.

Abbreviations: Dahl-S=Dahl salt-sensitive, NS=Normal Salt, HS=High Salt, HDL=high-density lipoprotein, LDL=low-density lipoprotein.

\* p < 0.05, \*\* p < 0.01, \*\*\* p < 0.001 vs Dahl-S-NS, # p < 0.05, ### p < 0.001 vs Dahl-S-HS

Supplementary Table 5. Effects of L-Carnitine Supplementation on Clinical Variables in Patients with Peritoneal Dialysis

|                                      | Control group (n=12) | L-carnitine group (n=12) | p-value between groups |
|--------------------------------------|----------------------|--------------------------|------------------------|
| Men : Women                          | 7: 5                 | 11 : 1                   | 0.063                  |
| Age (years old)                      | 63.1 ± 9.8           | 62.3 ± 10.5              | 0.858                  |
| Body Mass Index (kg/m <sup>2</sup> ) | 22.6 ± 2.5           | 24.8 ± 2.6               | <b>0.044</b>           |
| PD duration (day)                    | 635.1 ± 440.2        | 445.6 ± 348.4            | 0.255                  |
| Diabetes (No.) (-/+)                 | (11/1)               | (6/6)                    | <b>0.024</b>           |
| ACE-I or ARB (No.) (-/+)             | (3/9)                | (3/9)                    | 1.000                  |
| Dialysis efficiency parameters       |                      |                          |                        |
| PD efficiency (weekly-Kt/V)          |                      |                          |                        |
| Baseline                             | 1.03 ± 0.37          | 1.08 ± 0.21              | 0.646                  |
| Post-treatment                       | 0.96 ± 0.26          | 1.17 ± 0.28              | 0.486                  |
| p value vs. baseline                 | 0.588                | 0.408                    |                        |
| ΔPD efficiency                       | -0.07 ± 0.19         | 0.09 ± 0.20              | 0.066                  |
| RRF (weekly-Kt/V)                    |                      |                          |                        |
| Baseline                             | 0.86 ± 0.51          | 0.77 ± 0.34              | 0.607                  |
| Post-treatment                       | 0.59 ± 0.46          | 0.74 ± 0.37              | 0.386                  |
| p value vs. baseline                 | 0.194                | 0.872                    |                        |
| ΔRRF                                 | -0.26 ± 0.32         | -0.02 ± 0.22             | <b>0.043</b>           |
| Dialysate volume (L/day)             |                      |                          |                        |
| Baseline                             | 4.67 ± 1.12          | 5.73 ± 1.18              | <b>0.034</b>           |
| Post-treatment                       | 4.74 ± 1.11          | 5.88 ± 1.21              | <b>0.026</b>           |
| p value vs. baseline                 | 0.870                | 0.762                    |                        |
| ΔDialysate volume                    | 0.08 ± 0.70          | 0.15 ± 0.49              | 0.763                  |
| Urine volume (L/day)                 |                      |                          |                        |
| Baseline                             | 1.31 ± 0.66          | 1.18 ± 0.83              | 0.680                  |
| Post-treatment                       | 0.94 ± 0.57          | 1.28 ± 0.76              | 0.232                  |
| p value vs. baseline                 | 0.159                | 0.763                    |                        |
| ΔUrine volume                        | -0.37 ± 0.47         | 0.10 ± 0.32              | <b>0.010</b>           |
| D/P Creatinine                       |                      |                          |                        |
| Baseline                             | 0.60 ± 0.11          | 0.61 ± 0.11              | 0.912                  |
| Post-treatment                       | 0.64 ± 0.15          | 0.63 ± 0.10              | 0.863                  |
| p value vs. baseline                 | 0.522                | 0.655                    |                        |
| ΔD/P Creatinine                      | 0.03 ± 0.09          | -0.03 ± 0.23             | 0.363                  |
| D/D0 Glucose                         |                      |                          |                        |
| Baseline                             | 0.42 ± 0.10          | 0.42 ± 0.08              | 0.964                  |
| Post-treatment                       | 0.39 ± 0.11          | 0.40 ± 0.09              | 0.762                  |

|                          |                  |                  |              |
|--------------------------|------------------|------------------|--------------|
| p value vs. baseline     | 0.557            | 0.772            |              |
| $\Delta$ D/D0 Glucose    | -0.03 $\pm$ 0.06 | -0.04 $\pm$ 0.08 | 0.496        |
| Biomedical parameters    |                  |                  |              |
| Hemoglobin (g/dL)        |                  |                  |              |
| Baseline                 | 11.3 $\pm$ 1.4   | 11.8 $\pm$ 1.8   | 0.530        |
| Post-treatment           | 11.1 $\pm$ 1.1   | 11.2 $\pm$ 1.6   | 0.906        |
| p value vs. baseline     | 0.664            | 0.416            |              |
| $\Delta$ Hemoglobin      | -0.23 $\pm$ 1.48 | -0.58 $\pm$ 1.16 | 0.517        |
| Albumin (g/dL)           |                  |                  |              |
| Baseline                 | 3.3 $\pm$ 0.4    | 3.3 $\pm$ 0.2    | 0.910        |
| Post-treatment           | 3.2 $\pm$ 0.5    | 3.3 $\pm$ 0.2    | 0.618        |
| p value vs. baseline     | 0.530            | 0.766            |              |
| $\Delta$ Albumin         | -0.12 $\pm$ 0.27 | -0.03 $\pm$ 0.25 | 0.397        |
| BUN (mg/dL)              |                  |                  |              |
| Baseline                 | 54.6 $\pm$ 14.3  | 50.5 $\pm$ 9.5   | 0.412        |
| Post-treatment           | 65.7 $\pm$ 7.0   | 58.4 $\pm$ 10.5  | 0.057        |
| p value vs. baseline     | <b>0.025</b>     | 0.066            |              |
| $\Delta$ BUN             | 11.1 $\pm$ 13.8  | 7.9 $\pm$ 8.0    | 0.499        |
| Creatinine (mg/dL)       |                  |                  |              |
| Baseline                 | 9.7 $\pm$ 4.5    | 8.9 $\pm$ 2.3    | 0.578        |
| Post-treatment           | 11.6 $\pm$ 5.0   | 9.5 $\pm$ 2.6    | 0.201        |
| p value vs. baseline     | 0.348            | 0.601            |              |
| $\Delta$ Creatinine      | 1.9 $\pm$ 2.0    | 0.5 $\pm$ 0.8    | <b>0.044</b> |
| Uric acid (mg/dL)        |                  |                  |              |
| Baseline                 | 6.2 $\pm$ 1.1    | 6.4 $\pm$ 1.1    | 0.730        |
| Post-treatment           | 7.0 $\pm$ 1.6    | 6.6 $\pm$ 1.1    | 0.518        |
| p value vs. baseline     | 0.193            | 0.626            |              |
| $\Delta$ Uric acid       | 0.8 $\pm$ 0.9    | 0.2 $\pm$ 0.4    | 0.065        |
| LDL-cholesterol (mg/dL)  |                  |                  |              |
| Baseline                 | 102.6 $\pm$ 24.1 | 86.4 $\pm$ 23.6  | 0.111        |
| Post-treatment           | 106.8 $\pm$ 28.8 | 91.7 $\pm$ 22.5  | 0.165        |
| p value vs. baseline     | 0.699            | 0.580            |              |
| $\Delta$ LDL-cholesterol | 4.3 $\pm$ 21.1   | 5.3 $\pm$ 9.0    | 0.878        |
| Triglycerides (mg/dL)    |                  |                  |              |
| Baseline                 | 133.6 $\pm$ 40.8 | 154.3 $\pm$ 76.2 | 0.416        |
| Post-treatment           | 131.0 $\pm$ 41.7 | 159.5 $\pm$ 71.1 | 0.244        |
| p value vs. baseline     | 0.880            | 0.863            |              |
| $\Delta$ Triglycerides   | -2.6 $\pm$ 24.3  | 5.3 $\pm$ 45.1   | 0.612        |
| LPO (nmol/mL)            |                  |                  |              |
| Baseline                 | 4.2 $\pm$ 0.6    | 4.6 $\pm$ 0.8    | 0.139        |

|                           |              |               |              |
|---------------------------|--------------|---------------|--------------|
| Post-treatment            | 4.5 ± 0.9    | 4.0 ± 0.6     | 0.175        |
| p value vs. baseline      | 0.314        | 0.068         |              |
| ΔLPO                      | 0.32 ± 0.81  | -0.58 ± 0.67  | <b>0.007</b> |
| Urine L-FABP (ng/mL)      |              |               |              |
| Baseline                  | 78.7 ± 29.3  | 118.4 ± 69.3  | 0.081        |
| Post-treatment            | 98.2 ± 65.0  | 94.3 ± 39.6   | 0.862        |
| p value vs. baseline      | 0.355        | 0.307         |              |
| ΔUrine L-FABP             | 19.5 ± 53.7  | -24.1 ± 65.0  | 0.087        |
| Urine osmolality (mOsm/L) |              |               |              |
| Baseline                  | 256.7 ± 52.3 | 277.4 ± 52.4  | 0.342        |
| Post-treatment            | 259.8 ± 53.1 | 274.8 ± 84.1  | 0.604        |
| p value vs. baseline      | 0.887        | 0.929         |              |
| ΔUrine osmolality         | 3.1 ± 37.0   | -0.26 ± 104.0 | 0.860        |

Values are shown as mean ± SD or range.

PD=Peritoneal Dialysis, ACE-I=angiotensin converting enzyme inhibitor, ARB=angiotensin II receptor blocker, RRF=residual renal function, D/P Creatinine=dialysate to plasma creatinine ratio, D/D0 Glucose=4 to 0-hours dialysate glucose ratio, BUN=blood urea nitrogen, LDL=low-density lipoprotein, LPO=lipid peroxides, L-FABP=liver-type fatty acid binding protein.

Supplementary Table 6. Carnitine profiles in Patients with Peritoneal Dialysis with or without L-carnitine treatment

|                       | Control group (n=12) | L-carnitine group (n=12) | p-value between groups |
|-----------------------|----------------------|--------------------------|------------------------|
| <b>C0 (nmol/L)</b>    |                      |                          |                        |
| Baseline              | 27.569 ± 7.111       | 28.318 ± 7.240           | 0.801                  |
| Post-treatment        | 27.368 ± 6.140       | 116.451 ± 28.497         | <b>&lt;0.001</b>       |
| p value vs. baseline  | 0.941                | <b>&lt;0.001</b>         |                        |
| Δ C0                  | -0.202 ± 4.573       | 88.133 ± 27.874          | <b>&lt;0.001</b>       |
| <b>C2 (nmol/L)</b>    |                      |                          |                        |
| Baseline              | 9.057 ± 1.692        | 9.099 ± 2.153            | 0.958                  |
| Post-treatment        | 8.261 ± 1.235        | 34.909 ± 13.394          | <b>&lt;0.001</b>       |
| p value vs. baseline  | 0.202                | <b>&lt;0.001</b>         |                        |
| Δ C2                  | -0.796 ± 1.284       | 25.810 ± 12.816          | <b>&lt;0.001</b>       |
| <b>C3 (nmol/L)</b>    |                      |                          |                        |
| Baseline              | 0.289 ± 0.117        | 0.283 ± 0.103            | 0.884                  |
| Post-treatment        | 0.244 ± 0.070        | 1.580 ± 0.672            | <b>&lt;0.001</b>       |
| p value vs. baseline  | 0.265                | <b>&lt;0.001</b>         |                        |
| Δ C3                  | -0.045 ± 0.093       | 1.297 ± 0.628            | <b>&lt;0.001</b>       |
| <b>C4 (nmol/L)</b>    |                      |                          |                        |
| Baseline              | 0.476 ± 0.189        | 0.476 ± 0.130            | 0.996                  |
| Post-treatment        | 0.525 ± 0.171        | 1.759 ± 0.384            | <b>&lt;0.001</b>       |
| p value vs. baseline  | 0.516                | <b>&lt;0.001</b>         |                        |
| Δ C4                  | 0.049 ± 0.159        | 1.282 ± 0.367            | <b>&lt;0.001</b>       |
| <b>C5:1 (nmol/L)</b>  |                      |                          |                        |
| Baseline              | 0.061 ± 0.016        | 0.057 ± 0.010            | 0.521                  |
| Post-treatment        | 0.066 ± 0.013        | 0.078 ± 0.013            | <b>0.024</b>           |
| p value vs. baseline  | 0.407                | <b>&lt;0.001</b>         |                        |
| Δ C5:1                | 0.005 ± 0.012        | 0.021 ± 0.011            | <b>0.002</b>           |
| <b>C5 (nmol/L)</b>    |                      |                          |                        |
| Baseline              | 0.141 ± 0.035        | 1.143 ± 3.463            | 0.327                  |
| Post-treatment        | 0.136 ± 0.032        | 0.380 ± 0.127            | <b>&lt;0.001</b>       |
| p value vs. baseline  | 0.720                | 0.454                    |                        |
| Δ C5                  | -0.005 ± 0.037       | -0.763 ± 3.354           | 0.442                  |
| <b>C6 (nmol/L)</b>    |                      |                          |                        |
| Baseline              | 0.140 ± 0.069        | 0.100 ± 0.028            | 0.077                  |
| Post-treatment        | 0.103 ± 0.032        | 0.505 ± 0.274            | <b>&lt;0.001</b>       |
| p value vs. baseline  | 0.103                | <b>&lt;0.001</b>         |                        |
| Δ C6                  | -0.037 ± 0.079       | 0.405 ± 0.261            | <b>&lt;0.001</b>       |
| <b>C5-OH (nmol/L)</b> |                      |                          |                        |
| Baseline              | 0.088 ± 0.029        | 0.079 ± 0.014            | 0.347                  |
| Post-treatment        | 0.097 ± 0.022        | 0.146 ± 0.037            | <b>&lt;0.001</b>       |

|                      |                |                  |                  |
|----------------------|----------------|------------------|------------------|
| p value vs. baseline | 0.405          | <b>&lt;0.001</b> |                  |
| Δ C5-OH              | 0.009 ± 0.016  | 0.067 ± 0.029    | <b>&lt;0.001</b> |
| C8 (nmol/L)          |                |                  |                  |
| Baseline             | 0.090 ± 0.027  | 0.125 ± 0.045    | <b>0.031</b>     |
| Post-treatment       | 0.092 ± 0.030  | 0.330 ± 0.090    | <b>&lt;0.001</b> |
| p value vs. baseline | 0.879          | <b>&lt;0.001</b> |                  |
| Δ C8                 | 0.002 ± 0.031  | 0.205 ± 0.078    | <b>&lt;0.001</b> |
| C10:1 (nmol/L)       |                |                  |                  |
| Baseline             | 0.107 ± 0.032  | 0.162 ± 0.059    | <b>0.010</b>     |
| Post-treatment       | 0.114 ± 0.037  | 0.334 ± 0.085    | <b>&lt;0.001</b> |
| p value vs. baseline | 0.608          | <b>&lt;0.001</b> |                  |
| Δ C10:1              | 0.007 ± 0.033  | 0.173 ± 0.086    | <b>&lt;0.001</b> |
| C10 (nmol/L)         |                |                  |                  |
| Baseline             | 0.097 ± 0.038  | 0.162 ± 0.068    | <b>0.008</b>     |
| Post-treatment       | 0.095 ± 0.030  | 0.301 ± 0.091    | <b>&lt;0.001</b> |
| p value vs. baseline | 0.892          | <b>&lt;0.001</b> |                  |
| Δ C10                | -0.002 ± 0.034 | 0.139 ± 0.074    | <b>&lt;0.001</b> |
| C4DC (nmol/L)        |                |                  |                  |
| Baseline             | 0.395 ± 0.125  | 0.367 ± 0.077    | 0.515            |
| Post-treatment       | 0.429 ± 0.153  | 0.538 ± 0.105    | 0.053            |
| p value vs. baseline | 0.565          | <b>&lt;0.001</b> |                  |
| Δ C4DC               | 0.033 ± 0.059  | 0.170 ± 0.067    | <b>&lt;0.001</b> |
| C5DC (nmol/L)        |                |                  |                  |
| Baseline             | 0.574 ± 0.484  | 0.546 ± 0.169    | 0.851            |
| Post-treatment       | 0.717 ± 0.566  | 1.203 ± 0.340    | <b>0.018</b>     |
| p value vs. baseline | 0.514          | <b>&lt;0.001</b> |                  |
| Δ C5DC               | 0.143 ± 0.135  | 0.657 ± 0.256    | <b>&lt;0.001</b> |
| C12 (nmol/L)         |                |                  |                  |
| Baseline             | 0.070 ± 0.025  | 0.087 ± 0.021    | 0.094            |
| Post-treatment       | 0.085 ± 0.036  | 0.129 ± 0.030    | <b>0.003</b>     |
| p value vs. baseline | 0.257          | <b>&lt;0.001</b> |                  |
| Δ C12                | 0.015 ± 0.016  | 0.043 ± 0.023    | <b>0.002</b>     |
| C14:1 (nmol/L)       |                |                  |                  |
| Baseline             | 0.046 ± 0.013  | 0.065 ± 0.018    | <b>0.006</b>     |
| Post-treatment       | 0.050 ± 0.020  | 0.096 ± 0.026    | <b>&lt;0.001</b> |
| p value vs. baseline | 0.583          | <b>0.003</b>     |                  |
| Δ C14:1              | 0.004 ± 0.016  | 0.031 ± 0.023    | <b>0.003</b>     |
| C14 (nmol/L)         |                |                  |                  |
| Baseline             | 0.089 ± 0.046  | 0.102 ± 0.048    | 0.496            |
| Post-treatment       | 0.125 ± 0.082  | 0.161 ± 0.076    | 0.280            |
| p value vs. baseline | 0.196          | <b>0.033</b>     |                  |

|                      |               |                  |                  |
|----------------------|---------------|------------------|------------------|
| Δ C14                | 0.036 ± 0.051 | 0.059 ± 0.048    | 0.281            |
| C14-OH (nmol/L)      |               |                  |                  |
| Baseline             | 0.050 ± 0.006 | 0.053 ± 0.027    | 0.752            |
| Post-treatment       | 0.067 ± 0.049 | 0.105 ± 0.050    | 0.070            |
| p value vs. baseline | 0.295         | <b>0.005</b>     |                  |
| Δ C14-OH             | 0.017 ± 0.036 | 0.052 ± 0.046    | <b>0.049</b>     |
| C16 (nmol/L)         |               |                  |                  |
| Baseline             | 0.076 ± 0.026 | 0.082 ± 0.019    | 0.536            |
| Post-treatment       | 0.079 ± 0.026 | 0.149 ± 0.035    | <b>&lt;0.001</b> |
| p value vs. baseline | 0.768         | <b>&lt;0.001</b> |                  |
| Δ C16                | 0.003 ± 0.020 | 0.067 ± 0.026    | <b>&lt;0.001</b> |
| C16:1-OH (nmol/L)    |               |                  |                  |
| Baseline             | 0.008 ± 0.003 | 0.010 ± 0.002    | 0.090            |
| Post-treatment       | 0.009 ± 0.004 | 0.016 ± 0.005    | <b>&lt;0.001</b> |
| p value vs. baseline | 0.470         | <b>&lt;0.001</b> |                  |
| Δ C16:1-OH           | 0.001 ± 0.003 | 0.006 ± 0.003    | <b>0.001</b>     |
| C16-OH (nmol/L)      |               |                  |                  |
| Baseline             | 0.010 ± 0.003 | 0.010 ± 0.003    | 0.601            |
| Post-treatment       | 0.011 ± 0.006 | 0.018 ± 0.005    | <b>0.003</b>     |
| p value vs. baseline | 0.544         | <b>&lt;0.001</b> |                  |
| Δ C16-OH             | 0.001 ± 0.003 | 0.008 ± 0.005    | <b>&lt;0.001</b> |
| C18:1 (nmol/L)       |               |                  |                  |
| Baseline             | 0.067 ± 0.045 | 0.079 ± 0.028    | 0.445            |
| Post-treatment       | 0.076 ± 0.032 | 0.150 ± 0.059    | <b>&lt;0.001</b> |
| p value vs. baseline | 0.595         | <b>0.001</b>     |                  |
| Δ C18:1              | 0.009 ± 0.033 | 0.071 ± 0.044    | <b>&lt;0.001</b> |
| C18 (nmol/L)         |               |                  |                  |
| Baseline             | 0.025 ± 0.013 | 0.029 ± 0.006    | 0.344            |
| Post-treatment       | 0.027 ± 0.008 | 0.053 ± 0.017    | <b>&lt;0.001</b> |
| p value vs. baseline | 0.659         | <b>&lt;0.001</b> |                  |
| Δ C18                | 0.002 ± 0.009 | 0.024 ± 0.013    | <b>&lt;0.001</b> |
| C18:1-OH (nmol/L)    |               |                  |                  |
| Baseline             | 0.004 ± 0.001 | 0.006 ± 0.001    | <b>0.015</b>     |
| Post-treatment       | 0.005 ± 0.003 | 0.008 ± 0.002    | <b>0.001</b>     |
| p value vs. baseline | 0.443         | <b>0.004</b>     |                  |
| Δ C18:1-OH           | 0.001 ± 0.002 | 0.002 ± 0.002    | <b>0.024</b>     |
| C18-OH (nmol/L)      |               |                  |                  |
| Baseline             | 0.004 ± 0.002 | 0.005 ± 0.001    | 0.196            |
| Post-treatment       | 0.005 ± 0.003 | 0.008 ± 0.002    | <b>0.001</b>     |
| p value vs. baseline | 0.365         | <b>&lt;0.001</b> |                  |

|                                                    |                    |                     |                  |
|----------------------------------------------------|--------------------|---------------------|------------------|
| $\Delta$ C18-OH                                    | 0.001 $\pm$ 0.002  | 0.003 $\pm$ 0.002   | <b>0.002</b>     |
| Short-chain Acyl-C (C2+C3) (nmol/L)                |                    |                     |                  |
| Baseline                                           | 9.346 $\pm$ 1.788  | 9.381 $\pm$ 2.230   | 0.966            |
| Post-treatment                                     | 8.505 $\pm$ 1.277  | 36.489 $\pm$ 14.007 | <b>&lt;0.001</b> |
| p value vs. baseline                               | 0.198              | <b>&lt;0.001</b>    |                  |
| $\Delta$ Short-chain Acyl-C                        | -0.841 $\pm$ 1.332 | 27.108 $\pm$ 13.403 | <b>&lt;0.001</b> |
| Middle + Long-chain Acyl-C (C4 to C18-OH) (nmol/L) |                    |                     |                  |
| Baseline                                           | 2.617 $\pm$ 0.952  | 3.746 $\pm$ 3.237   | 0.259            |
| Post-treatment                                     | 2.910 $\pm$ 1.072  | 6.469 $\pm$ 1.151   | <b>&lt;0.001</b> |
| p value vs. baseline                               | 0.487              | <b>0.012</b>        |                  |
| $\Delta$ Middle -Long-chain Acyl-C                 | 0.293 $\pm$ 0.465  | 2.723 $\pm$ 3.144   | <b>0.015</b>     |
| The ratio of short / middle-long chain Acyl-C      |                    |                     |                  |
| Baseline                                           | 3.829 $\pm$ 1.064  | 3.202 $\pm$ 1.096   | 0.169            |
| Post-treatment                                     | 3.145 $\pm$ 0.861  | 5.589 $\pm$ 1.523   | <b>&lt;0.001</b> |
| p value vs. baseline                               | 0.097              | <b>&lt;0.001</b>    |                  |
| $\Delta$ S / M+L ratio                             | -0.685 $\pm$ 0.576 | 2.387 $\pm$ 1.238   | <b>&lt;0.001</b> |

Values are shown as mean  $\pm$  SD or range.

Acyl-C=acylcarnitine.

Supplementary Table 7. Primer sequences for real-time PCR

| Targeted gene    | Forward               | Reverse               |
|------------------|-----------------------|-----------------------|
| Il6              | TTCCATCCAGTTGCCTTCTT  | TTTCTCATTTCACGATTTC   |
| Tnfa             | GCCTCTTCTCATTCTGCTT   | GATCTGAGTGTGAGGGTCTGG |
| Ccl2             | CCACTCACCTGCTGCTACTC  | TGTCTGGACCCATTCTTCT   |
| Il18             | ACAACCTTTGGCCGACTTCAC | GGGTCACAGCCAGTCCTCT   |
| Il1b             | GCATCCAGCTTCAAATCTCAC | GGTGCTCATGTCCTCATCCT  |
| Acta2            | AGGGCTGGAGAATTGGATCT  | CCAGCAAAGGTCAGAGAAGG  |
| Pdgfrb           | CTGTCCGTGTTATGGCTCCT  | GGGACATCTGTTCCCACATC  |
| Timp2            | GTTTTGCAATGCAGATGTAG  | ATGTCGAGAACTCCTGCTT   |
| Tmlhe            | CTGTGCCTTACGACGTTGTC  | AGTTGACGGTAGCCAGTGAA  |
| 18s ribosome RNA | GACTCAACACGGGAAACCTC  | AACCAGACAAATCGCTCCAC  |

Il, interleukin; Tnf, tumor necrotic factor; Ccl, C-C motif chemokine ligand 2; Acta2, actin alpha 2, smooth muscle; Pdgfrb, platelet derived growth factor receptor beta; Timp2, tissue inhibitor of metalloproteinases 2; Tmlhe, trimethyllysine hydroxylase, epsilon.
